# Supplementary material for: Genomic Characterization of Rare Primary Cardiac Sarcoma Entities
Source: MDPI journal article supplement (doi:10.3390/diagnostics13020214), 2023-01-06
Supplement: s1 [file s1]

**Supplementary Table S2.** Differentially expressed genes ( $q$ -value<0.05) between the osteosarcoma sample (CS9) and the group comprising cardiac angiosarcomas (CS6 and CS7) and intimal sarcomas (CS1, CS2, CS3, CS4 and CS5) (logFC = log2 fold change; logCPM = log2 counts per million; FDR = false discovery rate).

| GENE SYMBOL | logFC | logCPM | p-value  | FDR      | GENE ID         |
|-------------|-------|--------|----------|----------|-----------------|
| WIF1        | 11.40 | 6.01   | 9.63E-29 | 2.70E-24 | ENSG00000156076 |
| CSMD3       | 8.42  | 4.99   | 1.75E-23 | 2.46E-19 | ENSG00000164796 |
| GRIK1       | 9.17  | 2.62   | 4.84E-18 | 4.52E-14 | ENSG00000171189 |
| COL11A2     | 4.98  | 6.20   | 7.42E-18 | 5.20E-14 | ENSG00000204248 |
| CDH10       | 9.25  | 3.06   | 1.06E-16 | 5.76E-13 | ENSG00000040731 |
| COL25A1     | 6.78  | 4.69   | 1.23E-16 | 5.76E-13 | ENSG00000188517 |
| HNRNPA1P6   | 6.60  | 3.71   | 1.85E-16 | 7.43E-13 | ENSG00000229887 |
| UNC13C      | 9.04  | 3.02   | 3.70E-16 | 1.30E-12 | ENSG00000137766 |
| CNTNAP4     | 9.59  | 3.48   | 4.48E-16 | 1.40E-12 | ENSG00000152910 |
| RGS7        | 10.31 | 1.90   | 8.20E-16 | 2.30E-12 | ENSG00000182901 |
| MUC2        | 8.04  | 4.00   | 5.25E-15 | 1.34E-11 | ENSG00000198788 |
| ZBED9       | 8.71  | 2.40   | 6.15E-15 | 1.44E-11 | ENSG00000232040 |
| CRABP1      | 9.26  | 2.73   | 1.86E-14 | 4.01E-11 | ENSG00000166426 |
| POU6F2      | 9.27  | 2.94   | 2.88E-14 | 5.77E-11 | ENSG00000106536 |
| KCNQ2       | 9.35  | 1.56   | 6.01E-14 | 1.12E-10 | ENSG00000075043 |
| DLK1        | 8.41  | 3.86   | 8.02E-14 | 1.41E-10 | ENSG00000185559 |
| RERGL       | 8.51  | 1.76   | 9.06E-14 | 1.49E-10 | ENSG00000111404 |
| OFCC1       | 8.73  | 1.74   | 1.53E-13 | 2.38E-10 | ENSG00000181355 |
| TMEM132C    | 8.96  | 2.80   | 2.48E-13 | 3.67E-10 | ENSG00000181234 |
| SEMA3A      | 3.99  | 6.20   | 7.32E-13 | 1.03E-09 | ENSG00000075213 |
| OLFM3       | 8.98  | 1.22   | 9.50E-13 | 1.24E-09 | ENSG00000118733 |
| MYH8        | 7.67  | 1.52   | 9.70E-13 | 1.24E-09 | ENSG00000133020 |
| SLC7A10     | 8.47  | 2.46   | 1.39E-12 | 1.69E-09 | ENSG00000130876 |
| KCNA1       | 7.49  | 1.97   | 1.80E-12 | 2.10E-09 | ENSG00000111262 |
| ADCY8       | 8.18  | 1.63   | 2.13E-12 | 2.39E-09 | ENSG00000155897 |
| LIX1        | 9.08  | 1.76   | 3.79E-12 | 4.05E-09 | ENSG00000145721 |
| TMEM196     | 9.26  | 0.90   | 3.90E-12 | 4.05E-09 | ENSG00000173452 |
| EYA4        | 6.74  | 5.93   | 5.96E-12 | 5.97E-09 | ENSG00000112319 |
| SNTG1       | 8.47  | 1.73   | 1.14E-11 | 1.10E-08 | ENSG00000147481 |
| GAS2        | 6.48  | 4.31   | 1.24E-11 | 1.16E-08 | ENSG00000148935 |
| SLC8A3      | 7.27  | 2.75   | 1.35E-11 | 1.22E-08 | ENSG00000100678 |
| NEFL        | 9.19  | 3.96   | 1.57E-11 | 1.37E-08 | ENSG00000277586 |
| LSAMP       | 7.51  | 2.97   | 1.62E-11 | 1.37E-08 | ENSG00000185565 |

|            |      |       |          |          |                 |
|------------|------|-------|----------|----------|-----------------|
| NKAIN3     | 8.42 | 1.12  | 2.61E-11 | 2.10E-08 | ENSG00000185942 |
| FMN2       | 7.76 | 1.47  | 2.62E-11 | 2.10E-08 | ENSG00000155816 |
| FBN3       | 7.91 | 3.84  | 3.37E-11 | 2.62E-08 | ENSG00000142449 |
| EPHA7      | 8.77 | 5.37  | 3.71E-11 | 2.81E-08 | ENSG00000135333 |
| NDST3      | 7.04 | 2.65  | 5.51E-11 | 4.07E-08 | ENSG00000164100 |
| RGS6       | 7.18 | 2.64  | 1.15E-10 | 8.28E-08 | ENSG00000182732 |
| KCTD8      | 8.64 | 0.36  | 1.94E-10 | 1.36E-07 | ENSG00000183783 |
| TNMD       | 7.85 | 2.62  | 2.07E-10 | 1.42E-07 | ENSG00000000005 |
| ISL1       | 8.62 | 0.34  | 2.18E-10 | 1.46E-07 | ENSG00000016082 |
| USH1C      | 7.80 | 3.82  | 2.28E-10 | 1.47E-07 | ENSG00000006611 |
| KANK4      | 7.04 | 3.05  | 2.31E-10 | 1.47E-07 | ENSG00000132854 |
| PROKR2     | 8.18 | 0.41  | 2.96E-10 | 1.84E-07 | ENSG00000101292 |
| MPPED1     | 8.49 | 0.23  | 4.73E-10 | 2.84E-07 | ENSG00000186732 |
| SOX5P1     | 8.37 | 0.68  | 4.76E-10 | 2.84E-07 | ENSG00000254376 |
| SYCP1      | 7.95 | 0.70  | 5.70E-10 | 3.33E-07 | ENSG00000198765 |
| ADAMTS20   | 6.68 | 3.25  | 1.00E-09 | 5.73E-07 | ENSG00000173157 |
| PCDH11Y    | 7.22 | 2.15  | 1.63E-09 | 9.13E-07 | ENSG00000099715 |
| COL26A1    | 6.78 | 1.03  | 1.66E-09 | 9.13E-07 | ENSG00000160963 |
| NRXN1      | 6.43 | 2.54  | 1.69E-09 | 9.14E-07 | ENSG00000179915 |
| CHRNA7     | 8.12 | -0.09 | 3.43E-09 | 1.81E-06 | ENSG00000196811 |
| SYT4       | 7.70 | 0.08  | 3.72E-09 | 1.93E-06 | ENSG00000132872 |
| ZNF804B    | 7.98 | 1.71  | 4.36E-09 | 2.22E-06 | ENSG00000182348 |
| CDH7       | 7.64 | 0.04  | 4.67E-09 | 2.34E-06 | ENSG00000081138 |
| TOX3       | 8.26 | 1.57  | 4.85E-09 | 2.39E-06 | ENSG00000103460 |
| NEFM       | 6.73 | 1.88  | 5.06E-09 | 2.44E-06 | ENSG00000104722 |
| FBXL21     | 6.96 | 2.28  | 5.28E-09 | 2.51E-06 | ENSG00000164616 |
| MUCL1      | 8.03 | -0.16 | 5.99E-09 | 2.80E-06 | ENSG00000172551 |
| SHISA3     | 7.05 | 2.91  | 6.55E-09 | 3.01E-06 | ENSG00000178343 |
| UNCX       | 7.99 | -0.21 | 7.30E-09 | 3.30E-06 | ENSG00000164853 |
| COL2A1     | 7.94 | 5.96  | 7.54E-09 | 3.35E-06 | ENSG00000139219 |
| USP6       | 5.91 | 5.35  | 7.82E-09 | 3.43E-06 | ENSG00000129204 |
| CABS1      | 7.96 | -0.21 | 8.43E-09 | 3.64E-06 | ENSG00000145309 |
| AC019197.1 | 7.19 | 0.03  | 8.81E-09 | 3.74E-06 | ENSG00000236283 |
| RBMX2QP    | 7.58 | -0.11 | 8.93E-09 | 3.74E-06 | ENSG00000236718 |
| MAB21L1    | 6.26 | 2.03  | 1.09E-08 | 4.40E-06 | ENSG00000180660 |
| KLHL14     | 6.81 | 1.43  | 1.09E-08 | 4.40E-06 | ENSG00000197705 |
| ERC2       | 6.08 | 1.81  | 1.10E-08 | 4.40E-06 | ENSG00000187672 |
| SHISA2B    | 7.93 | -0.30 | 1.15E-08 | 4.55E-06 | ENSG00000145642 |
| GPC5       | 6.65 | 1.33  | 1.35E-08 | 5.25E-06 | ENSG00000179399 |

|           |      |       |          |          |                 |
|-----------|------|-------|----------|----------|-----------------|
| SYT10     | 7.84 | -0.32 | 1.63E-08 | 6.27E-06 | ENSG00000110975 |
| BPIFB4    | 6.55 | 0.20  | 1.66E-08 | 6.28E-06 | ENSG00000186191 |
| CHRND     | 7.34 | 0.14  | 1.96E-08 | 7.32E-06 | ENSG00000135902 |
| YBX2      | 6.33 | 1.26  | 2.26E-08 | 8.35E-06 | ENSG00000006047 |
| KIF5A     | 4.79 | 2.21  | 2.35E-08 | 8.57E-06 | ENSG00000155980 |
| MYO16     | 6.13 | 2.03  | 2.40E-08 | 8.64E-06 | ENSG00000041515 |
| SLC15A1   | 7.24 | 0.10  | 3.34E-08 | 1.17E-05 | ENSG00000088386 |
| AGXT2     | 7.31 | -0.28 | 3.35E-08 | 1.17E-05 | ENSG00000113492 |
| MKX       | 5.37 | 3.44  | 3.44E-08 | 1.19E-05 | ENSG00000150051 |
| TDRD12    | 6.15 | 4.59  | 3.55E-08 | 1.22E-05 | ENSG00000173809 |
| CACNA1B   | 5.25 | 1.75  | 3.98E-08 | 1.34E-05 | ENSG00000148408 |
| CCNB3     | 4.64 | 3.37  | 4.20E-08 | 1.40E-05 | ENSG00000147082 |
| ELAVL4    | 5.61 | 1.37  | 4.26E-08 | 1.41E-05 | ENSG00000162374 |
| SERHL2    | 4.86 | 2.80  | 4.32E-08 | 1.41E-05 | ENSG00000183569 |
| ALX4      | 5.71 | 0.79  | 5.29E-08 | 1.70E-05 | ENSG00000052850 |
| FRRS1L    | 6.26 | 0.59  | 5.37E-08 | 1.70E-05 | ENSG00000260230 |
| SLCO1A2   | 6.46 | 2.94  | 5.39E-08 | 1.70E-05 | ENSG00000084453 |
| DAZ1      | 7.62 | -0.49 | 5.89E-08 | 1.82E-05 | ENSG00000188120 |
| DPY19L2P4 | 7.20 | -0.36 | 5.89E-08 | 1.82E-05 | ENSG00000235436 |
| PIK3C2G   | 9.35 | 6.03  | 8.21E-08 | 2.50E-05 | ENSG00000139144 |
| TNFRSF19  | 3.74 | 5.12  | 8.49E-08 | 2.56E-05 | ENSG00000127863 |
| OTX2      | 7.55 | -0.60 | 8.76E-08 | 2.61E-05 | ENSG00000165588 |
| NELL1     | 7.12 | -0.41 | 9.66E-08 | 2.85E-05 | ENSG00000165973 |
| PHF21B    | 6.99 | -0.10 | 1.05E-07 | 3.07E-05 | ENSG00000056487 |
| FGFR3     | 4.84 | 3.14  | 1.12E-07 | 3.23E-05 | ENSG00000068078 |
| VWDE      | 6.80 | 4.73  | 1.13E-07 | 3.23E-05 | ENSG00000146530 |
| ZNF793    | 4.74 | 2.54  | 1.16E-07 | 3.27E-05 | ENSG00000188227 |
| SPOCK3    | 7.56 | 1.65  | 1.28E-07 | 3.57E-05 | ENSG00000196104 |
| OR6C70    | 7.43 | -0.62 | 1.29E-07 | 3.57E-05 | ENSG00000184954 |
| NDST4     | 6.20 | 1.58  | 1.30E-07 | 3.57E-05 | ENSG00000138653 |
| NPTX2     | 6.61 | 2.97  | 1.36E-07 | 3.71E-05 | ENSG00000106236 |
| MAPK4     | 6.32 | 0.24  | 1.43E-07 | 3.87E-05 | ENSG00000141639 |
| UNC5D     | 6.78 | -0.12 | 1.60E-07 | 4.24E-05 | ENSG00000156687 |
| LGR5      | 6.76 | 5.98  | 1.60E-07 | 4.24E-05 | ENSG00000139292 |
| KCTD4     | 7.39 | -0.65 | 1.76E-07 | 4.60E-05 | ENSG00000180332 |
| SNCAIP    | 3.65 | 5.56  | 1.94E-07 | 4.99E-05 | ENSG00000064692 |
| SOHLH1    | 6.95 | -0.50 | 1.94E-07 | 4.99E-05 | ENSG00000165643 |
| BRINP1    | 6.67 | 0.70  | 2.33E-07 | 5.95E-05 | ENSG00000078725 |
| FRMPD1    | 6.83 | 0.95  | 2.44E-07 | 6.16E-05 | ENSG00000070601 |

|            |      |       |          |          |                 |
|------------|------|-------|----------|----------|-----------------|
| NKAIN4     | 6.06 | 1.12  | 2.49E-07 | 6.23E-05 | ENSG00000101198 |
| GAGE2A     | 7.29 | 1.23  | 2.75E-07 | 6.83E-05 | ENSG00000189064 |
| LINC01597  | 6.78 | -0.28 | 3.05E-07 | 7.51E-05 | ENSG00000205611 |
| PAX1       | 7.26 | -0.76 | 3.13E-07 | 7.63E-05 | ENSG00000125813 |
| MYLPF      | 7.22 | -0.80 | 3.57E-07 | 8.63E-05 | ENSG00000180209 |
| PPP1R12BP1 | 7.21 | -0.80 | 3.73E-07 | 8.89E-05 | ENSG00000229238 |
| ALX3       | 7.21 | -0.80 | 3.74E-07 | 8.89E-05 | ENSG00000156150 |
| EMILIN3    | 5.91 | 1.94  | 3.78E-07 | 8.92E-05 | ENSG00000183798 |
| FAM3B      | 5.15 | 0.78  | 4.37E-07 | 1.02E-04 | ENSG00000183844 |
| NKD1       | 4.57 | 2.99  | 4.40E-07 | 1.02E-04 | ENSG00000140807 |
| CXorf67    | 6.16 | 0.07  | 4.44E-07 | 1.02E-04 | ENSG00000187690 |
| BMP5       | 7.41 | 4.55  | 5.32E-07 | 1.21E-04 | ENSG00000112175 |
| BEND4      | 6.17 | -0.10 | 5.36E-07 | 1.21E-04 | ENSG00000188848 |
| PAX2       | 7.15 | -0.84 | 5.48E-07 | 1.23E-04 | ENSG00000075891 |
| LEMD1      | 7.11 | -0.88 | 6.29E-07 | 1.40E-04 | ENSG00000186007 |
| ANKRD18A   | 5.12 | 2.96  | 6.37E-07 | 1.41E-04 | ENSG00000180071 |
| CCDC178    | 6.53 | 1.04  | 6.48E-07 | 1.41E-04 | ENSG00000166960 |
| COL9A2     | 3.49 | 4.20  | 6.50E-07 | 1.41E-04 | ENSG00000049089 |
| DDX11L10   | 7.05 | -0.11 | 6.69E-07 | 1.44E-04 | ENSG00000233614 |
| COL13A1    | 4.18 | 4.66  | 6.81E-07 | 1.46E-04 | ENSG00000197467 |
| VSTM2A     | 6.71 | -0.74 | 7.08E-07 | 1.50E-04 | ENSG00000170419 |
| AC013470.1 | 5.80 | -0.52 | 7.11E-07 | 1.50E-04 | ENSG00000224667 |
| UBE3AP2    | 5.24 | 1.06  | 7.52E-07 | 1.57E-04 | ENSG00000228941 |
| OPRK1      | 7.03 | -0.92 | 8.08E-07 | 1.67E-04 | ENSG00000082556 |
| RPL23AP96  | 7.03 | -0.92 | 8.09E-07 | 1.67E-04 | ENSG00000250752 |
| FSTL5      | 6.64 | 3.06  | 8.93E-07 | 1.83E-04 | ENSG00000168843 |
| DKK2       | 4.90 | 2.40  | 9.23E-07 | 1.87E-04 | ENSG00000155011 |
| LMX1A      | 6.30 | -0.68 | 9.24E-07 | 1.87E-04 | ENSG00000162761 |
| HEPHL1     | 6.37 | 2.13  | 9.61E-07 | 1.91E-04 | ENSG00000181333 |
| ARMC4      | 4.52 | 5.56  | 9.62E-07 | 1.91E-04 | ENSG00000169126 |
| RTL1       | 6.99 | -0.96 | 1.11E-06 | 2.19E-04 | ENSG00000254656 |
| TG         | 3.29 | 5.75  | 1.12E-06 | 2.19E-04 | ENSG00000042832 |
| TNNI1      | 6.86 | -0.60 | 1.29E-06 | 2.50E-04 | ENSG00000159173 |
| IRX1       | 7.02 | 0.19  | 1.31E-06 | 2.53E-04 | ENSG00000170549 |
| NELL2      | 4.17 | 4.92  | 1.39E-06 | 2.67E-04 | ENSG00000184613 |
| PRDM11     | 3.17 | 4.89  | 1.40E-06 | 2.67E-04 | ENSG00000019485 |
| DCHS2      | 5.56 | 2.56  | 1.43E-06 | 2.70E-04 | ENSG00000197410 |
| DLX4       | 4.86 | 0.28  | 1.50E-06 | 2.81E-04 | ENSG00000108813 |
| CSN3       | 6.03 | -0.45 | 1.50E-06 | 2.81E-04 | ENSG00000171209 |

|            |      |       |          |          |                 |
|------------|------|-------|----------|----------|-----------------|
| ATXN7L2    | 3.60 | 3.67  | 1.58E-06 | 2.94E-04 | ENSG00000162650 |
| NTS        | 6.51 | 2.20  | 1.65E-06 | 3.04E-04 | ENSG00000133636 |
| AC068446.3 | 6.45 | -0.54 | 1.79E-06 | 3.27E-04 | ENSG00000258883 |
| BCL11A     | 4.85 | 2.47  | 1.80E-06 | 3.27E-04 | ENSG00000119866 |
| IRS4       | 5.65 | 0.51  | 1.87E-06 | 3.38E-04 | ENSG00000133124 |
| C2CD4C     | 6.41 | -0.57 | 2.04E-06 | 3.67E-04 | ENSG00000183186 |
| IL17RD     | 3.37 | 4.03  | 2.25E-06 | 4.02E-04 | ENSG00000144730 |
| RNF175     | 5.51 | 1.90  | 2.30E-06 | 4.08E-04 | ENSG00000145428 |
| ANKRD33    | 5.59 | 1.03  | 2.39E-06 | 4.22E-04 | ENSG00000167612 |
| GRIA1      | 6.21 | 3.49  | 2.42E-06 | 4.24E-04 | ENSG00000155511 |
| SELEN OV   | 6.27 | -0.47 | 2.63E-06 | 4.57E-04 | ENSG00000186838 |
| KIRREL2    | 6.06 | -0.82 | 2.66E-06 | 4.61E-04 | ENSG00000126259 |
| HMGCLL1    | 6.69 | -0.70 | 2.72E-06 | 4.69E-04 | ENSG00000146151 |
| PRKG2      | 5.29 | 0.68  | 2.78E-06 | 4.76E-04 | ENSG00000138669 |
| AGMO       | 5.30 | 4.86  | 2.89E-06 | 4.91E-04 | ENSG00000187546 |
| RPL39P29   | 6.73 | -0.33 | 3.13E-06 | 5.30E-04 | ENSG00000236860 |
| FGF14      | 6.44 | 1.18  | 3.73E-06 | 6.27E-04 | ENSG00000102466 |
| PTCHD4     | 4.11 | 3.45  | 3.76E-06 | 6.27E-04 | ENSG00000244694 |
| ZNF571-AS1 | 5.31 | 0.42  | 3.83E-06 | 6.34E-04 | ENSG00000267470 |
| ERBB4      | 5.95 | 4.28  | 3.84E-06 | 6.34E-04 | ENSG00000178568 |
| IGLV11-55  | 5.51 | 0.35  | 4.04E-06 | 6.61E-04 | ENSG00000211641 |
| NCAN       | 5.96 | -0.65 | 4.05E-06 | 6.61E-04 | ENSG00000130287 |
| SORCS1     | 6.32 | 0.65  | 4.15E-06 | 6.73E-04 | ENSG00000108018 |
| PEX5L      | 5.93 | -0.47 | 4.27E-06 | 6.87E-04 | ENSG00000114757 |
| RORB       | 6.47 | 0.63  | 4.50E-06 | 7.21E-04 | ENSG00000198963 |
| MAG        | 5.80 | 0.82  | 4.59E-06 | 7.32E-04 | ENSG00000105695 |
| INTS4P2    | 5.46 | -0.32 | 5.10E-06 | 8.08E-04 | ENSG00000273024 |
| UGT3A2     | 6.27 | -1.07 | 5.32E-06 | 8.38E-04 | ENSG00000168671 |
| AC008805.2 | 5.98 | -0.19 | 5.51E-06 | 8.64E-04 | ENSG00000267555 |
| CPA6       | 5.23 | -0.50 | 5.61E-06 | 8.74E-04 | ENSG00000165078 |
| NOS1       | 5.92 | -0.95 | 5.67E-06 | 8.78E-04 | ENSG00000089250 |
| CNTNAP5    | 5.28 | 0.24  | 5.74E-06 | 8.84E-04 | ENSG00000155052 |
| PROM1      | 5.28 | 3.41  | 5.87E-06 | 8.99E-04 | ENSG00000007062 |
| MYOG       | 6.63 | -1.19 | 6.03E-06 | 9.18E-04 | ENSG00000122180 |
| DRD1       | 6.62 | -1.19 | 6.11E-06 | 9.21E-04 | ENSG00000184845 |
| AC109466.1 | 6.62 | -1.19 | 6.11E-06 | 9.21E-04 | ENSG00000241956 |
| CCDC169    | 4.94 | 0.81  | 6.23E-06 | 9.35E-04 | ENSG00000242715 |
| AC112206.4 | 5.79 | -0.52 | 6.60E-06 | 9.84E-04 | ENSG00000250669 |
| OGDHL      | 5.82 | -0.21 | 6.67E-06 | 9.89E-04 | ENSG00000197444 |

|            |      |       |          |          |                 |
|------------|------|-------|----------|----------|-----------------|
| OR8G5      | 6.19 | -1.12 | 6.81E-06 | 1.00E-03 | ENSG00000255298 |
| TAC1       | 6.19 | -1.12 | 6.82E-06 | 1.00E-03 | ENSG00000006128 |
| PHF2P2     | 6.42 | 3.93  | 7.18E-06 | 1.05E-03 | ENSG00000226057 |
| GABRB1     | 6.05 | -0.33 | 7.48E-06 | 1.09E-03 | ENSG00000163288 |
| NBEA       | 3.32 | 7.71  | 7.73E-06 | 1.12E-03 | ENSG00000172915 |
| TSHR       | 4.51 | 1.41  | 7.76E-06 | 1.12E-03 | ENSG00000165409 |
| HNRNPA1P2  | 4.14 | 2.72  | 7.99E-06 | 1.14E-03 | ENSG00000237285 |
| FAM9A      | 6.54 | -1.24 | 8.00E-06 | 1.14E-03 | ENSG00000183304 |
| KCNA2      | 4.96 | 2.29  | 8.05E-06 | 1.14E-03 | ENSG00000177301 |
| ESPNP      | 5.57 | -0.13 | 8.44E-06 | 1.19E-03 | ENSG00000268869 |
| MPL        | 5.29 | 1.10  | 8.67E-06 | 1.22E-03 | ENSG00000117400 |
| AC097478.1 | 6.49 | -0.51 | 8.72E-06 | 1.22E-03 | ENSG00000251095 |
| ATRNLI     | 4.61 | 4.22  | 8.80E-06 | 1.22E-03 | ENSG00000107518 |
| SRD5A2     | 6.09 | -0.83 | 9.67E-06 | 1.34E-03 | ENSG00000277893 |
| SPHKAP     | 5.99 | 0.09  | 1.01E-05 | 1.39E-03 | ENSG00000153820 |
| KRTAP11-1  | 6.51 | -1.30 | 1.11E-05 | 1.52E-03 | ENSG00000182591 |
| RXFP2      | 5.54 | -0.96 | 1.12E-05 | 1.52E-03 | ENSG00000133105 |
| LHFPL1     | 5.99 | -0.86 | 1.14E-05 | 1.55E-03 | ENSG00000182508 |
| ADCY5      | 4.24 | 3.18  | 1.22E-05 | 1.65E-03 | ENSG00000173175 |
| AL391261.2 | 6.46 | -1.29 | 1.28E-05 | 1.72E-03 | ENSG00000258847 |
| SULT1C2    | 5.59 | 0.95  | 1.30E-05 | 1.73E-03 | ENSG00000198203 |
| GPR50      | 5.49 | -1.01 | 1.36E-05 | 1.81E-03 | ENSG00000102195 |
| LRFN2      | 5.44 | -1.00 | 1.49E-05 | 1.98E-03 | ENSG00000156564 |
| TGFA       | 4.16 | 0.63  | 1.54E-05 | 2.02E-03 | ENSG00000163235 |
| RGS20      | 5.07 | 1.27  | 1.54E-05 | 2.02E-03 | ENSG00000147509 |
| MC4R       | 5.80 | -0.85 | 1.55E-05 | 2.02E-03 | ENSG00000166603 |
| PKHD1      | 4.68 | 2.72  | 1.56E-05 | 2.02E-03 | ENSG00000170927 |
| PTPRVP     | 5.07 | -0.44 | 1.59E-05 | 2.05E-03 | ENSG00000243323 |
| RTP3       | 6.36 | -1.34 | 1.68E-05 | 2.17E-03 | ENSG00000163825 |
| WDR72      | 6.03 | 0.10  | 1.74E-05 | 2.23E-03 | ENSG00000166415 |
| SLC1A3     | 2.62 | 5.81  | 1.77E-05 | 2.26E-03 | ENSG00000079215 |
| TRPC5      | 6.34 | -1.34 | 1.82E-05 | 2.30E-03 | ENSG00000072315 |
| ODAM       | 5.76 | 2.31  | 1.82E-05 | 2.30E-03 | ENSG00000109205 |
| MRPL9P1    | 5.94 | -1.20 | 1.89E-05 | 2.38E-03 | ENSG00000254305 |
| DAB1       | 5.45 | 0.81  | 1.92E-05 | 2.39E-03 | ENSG00000173406 |
| PRSS44     | 4.71 | -0.02 | 1.93E-05 | 2.39E-03 | ENSG00000226074 |
| KCNA4      | 5.91 | -0.95 | 1.93E-05 | 2.39E-03 | ENSG00000182255 |
| ZNF157     | 4.34 | 0.17  | 1.98E-05 | 2.44E-03 | ENSG00000147117 |
| TGS1       | 2.41 | 6.84  | 2.01E-05 | 2.48E-03 | ENSG00000137574 |

|            |       |       |          |          |                 |
|------------|-------|-------|----------|----------|-----------------|
| KNDC1      | 5.54  | 1.72  | 2.06E-05 | 2.52E-03 | ENSG00000171798 |
| BOC        | 3.44  | 5.86  | 2.17E-05 | 2.64E-03 | ENSG00000144857 |
| CCDC162P   | 4.05  | 2.98  | 2.19E-05 | 2.66E-03 | ENSG00000203799 |
| MPPED2     | 4.81  | 3.36  | 2.21E-05 | 2.67E-03 | ENSG00000066382 |
| EBF3       | 3.00  | 5.06  | 2.22E-05 | 2.68E-03 | ENSG00000108001 |
| PSPC1P1    | 4.51  | -0.30 | 2.26E-05 | 2.71E-03 | ENSG00000227879 |
| ASNSP1     | 5.41  | 0.64  | 2.33E-05 | 2.78E-03 | ENSG00000248498 |
| TTPA       | 5.83  | -0.19 | 2.51E-05 | 2.97E-03 | ENSG00000137561 |
| WFIKKN2    | 5.04  | -0.76 | 2.51E-05 | 2.97E-03 | ENSG00000173714 |
| ASXL3      | 5.23  | 4.34  | 2.54E-05 | 2.99E-03 | ENSG00000141431 |
| ROBO2      | 5.32  | 4.61  | 2.59E-05 | 3.03E-03 | ENSG00000185008 |
| RPL21P71   | 5.55  | -0.91 | 2.59E-05 | 3.03E-03 | ENSG00000239412 |
| PAPPA2     | 4.93  | 4.02  | 2.80E-05 | 3.25E-03 | ENSG00000116183 |
| KC6        | 5.65  | -0.93 | 2.85E-05 | 3.30E-03 | ENSG00000267313 |
| SLCO4C1    | 4.48  | 1.01  | 2.92E-05 | 3.37E-03 | ENSG00000173930 |
| 11-Mar     | 6.83  | 1.10  | 2.96E-05 | 3.40E-03 | ENSG00000183654 |
| SYN3       | 5.18  | 1.52  | 3.20E-05 | 3.65E-03 | ENSG00000185666 |
| FAM135B    | 4.93  | -0.61 | 3.21E-05 | 3.65E-03 | ENSG00000147724 |
| CYP3A4     | 5.11  | -0.65 | 3.22E-05 | 3.65E-03 | ENSG00000160868 |
| LINC01529  | 5.84  | -1.25 | 3.24E-05 | 3.66E-03 | ENSG00000225872 |
| SLC9A2     | 4.65  | -0.41 | 3.25E-05 | 3.66E-03 | ENSG00000115616 |
| AACSP1     | 5.29  | 1.12  | 3.30E-05 | 3.70E-03 | ENSG00000250420 |
| NPHS1      | 5.28  | -0.43 | 3.32E-05 | 3.71E-03 | ENSG00000161270 |
| PCDH15     | 5.55  | 2.52  | 3.38E-05 | 3.76E-03 | ENSG00000150275 |
| OPTN       | -4.54 | 8.09  | 3.41E-05 | 3.78E-03 | ENSG00000123240 |
| AC004540.2 | 5.71  | -0.79 | 3.44E-05 | 3.79E-03 | ENSG00000225792 |
| SMYD1      | 6.09  | -1.10 | 3.55E-05 | 3.89E-03 | ENSG00000115593 |
| SHANK2     | 6.09  | 3.61  | 3.55E-05 | 3.89E-03 | ENSG00000162105 |
| GRIN2C     | 4.33  | 0.70  | 3.81E-05 | 4.13E-03 | ENSG00000161509 |
| NNMT       | -5.05 | 5.34  | 3.81E-05 | 4.13E-03 | ENSG00000166741 |
| AL357373.1 | 5.00  | -1.05 | 3.81E-05 | 4.13E-03 | ENSG00000233216 |
| AL603840.1 | 5.86  | -0.13 | 3.95E-05 | 4.26E-03 | ENSG00000234810 |
| ZFHX4      | 4.05  | 8.66  | 3.97E-05 | 4.27E-03 | ENSG00000091656 |
| ZNF236     | 2.32  | 6.99  | 3.99E-05 | 4.27E-03 | ENSG00000130856 |
| MYB        | 4.25  | 3.26  | 4.09E-05 | 4.37E-03 | ENSG00000118513 |
| ZNF232     | 2.97  | 5.06  | 4.27E-05 | 4.53E-03 | ENSG00000167840 |
| GABRG3     | 6.14  | -1.45 | 4.35E-05 | 4.60E-03 | ENSG00000182256 |
| CD101      | 3.51  | 3.71  | 4.44E-05 | 4.68E-03 | ENSG00000134256 |
| SH3GL3     | 4.15  | 2.20  | 4.78E-05 | 5.02E-03 | ENSG00000140600 |

|             |       |       |          |          |                 |
|-------------|-------|-------|----------|----------|-----------------|
| SYT9        | 4.73  | -0.35 | 4.88E-05 | 5.10E-03 | ENSG00000170743 |
| NMUR2       | 5.70  | -1.36 | 4.98E-05 | 5.19E-03 | ENSG00000132911 |
| CPAMD8      | 4.00  | 3.47  | 5.01E-05 | 5.21E-03 | ENSG00000160111 |
| ZNF516      | 3.22  | 5.88  | 5.36E-05 | 5.55E-03 | ENSG00000101493 |
| GDF7        | 4.35  | -0.01 | 5.58E-05 | 5.76E-03 | ENSG00000143869 |
| MIR548F2    | 6.00  | -1.15 | 5.65E-05 | 5.80E-03 | ENSG00000221782 |
| B3GALT1     | 5.61  | -0.66 | 5.68E-05 | 5.80E-03 | ENSG00000172318 |
| PTPN20      | 4.15  | 3.20  | 5.70E-05 | 5.80E-03 | ENSG00000204179 |
| SPIDR       | 2.18  | 7.81  | 5.71E-05 | 5.80E-03 | ENSG00000164808 |
| AC104057.1  | 6.04  | -1.51 | 5.79E-05 | 5.86E-03 | ENSG00000230386 |
| GAGE1       | 6.04  | -1.51 | 5.89E-05 | 5.94E-03 | ENSG00000205777 |
| SLAIN1      | 4.09  | 3.18  | 5.94E-05 | 5.97E-03 | ENSG00000139737 |
| LCT         | 3.94  | 2.23  | 6.13E-05 | 6.13E-03 | ENSG00000115850 |
| ATP8A2      | 3.74  | 2.91  | 6.18E-05 | 6.17E-03 | ENSG00000132932 |
| MYO5B       | 3.72  | 4.20  | 6.41E-05 | 6.37E-03 | ENSG00000167306 |
| TSBP1-AS1   | 4.49  | 0.95  | 6.63E-05 | 6.56E-03 | ENSG00000225914 |
| COL20A1     | 4.40  | -0.28 | 6.65E-05 | 6.56E-03 | ENSG00000101203 |
| LGALS3BP    | -5.26 | 5.99  | 6.84E-05 | 6.73E-03 | ENSG00000108679 |
| KIRREL3     | 4.99  | -0.89 | 7.05E-05 | 6.91E-03 | ENSG00000149571 |
| PSMC1P9     | 5.14  | -0.64 | 7.16E-05 | 6.99E-03 | ENSG00000255993 |
| SPRY2       | 2.47  | 5.86  | 7.53E-05 | 7.33E-03 | ENSG00000136158 |
| COL24A1     | 3.30  | 6.09  | 7.56E-05 | 7.34E-03 | ENSG00000171502 |
| FREM2       | 5.53  | 2.42  | 7.73E-05 | 7.45E-03 | ENSG00000150893 |
| LRRN3       | 4.54  | 2.33  | 7.75E-05 | 7.45E-03 | ENSG00000173114 |
| CTNNA2      | 6.40  | 0.41  | 7.77E-05 | 7.45E-03 | ENSG00000066032 |
| FAT2        | 4.14  | 2.60  | 7.81E-05 | 7.45E-03 | ENSG00000086570 |
| AC008750.2  | 4.34  | -0.78 | 7.82E-05 | 7.45E-03 | ENSG00000255441 |
| ALB         | 4.17  | 1.10  | 7.84E-05 | 7.45E-03 | ENSG00000163631 |
| NKAIN2      | 5.00  | -0.19 | 7.91E-05 | 7.47E-03 | ENSG00000188580 |
| LRRIQ1      | 4.17  | 4.28  | 7.91E-05 | 7.47E-03 | ENSG00000133640 |
| AC079601.1  | 3.74  | 0.99  | 7.94E-05 | 7.47E-03 | ENSG00000257225 |
| THSD7A      | 3.45  | 6.39  | 8.03E-05 | 7.53E-03 | ENSG00000005108 |
| BX649567.1  | 4.86  | -0.88 | 8.17E-05 | 7.64E-03 | ENSG00000284737 |
| BRIP1       | 2.28  | 6.68  | 8.64E-05 | 8.05E-03 | ENSG00000136492 |
| IGKV2OR22-3 | 5.90  | -1.56 | 8.71E-05 | 8.09E-03 | ENSG00000253460 |
| FAM19A1     | 5.59  | -1.41 | 8.96E-05 | 8.29E-03 | ENSG00000183662 |
| OSBP2       | 3.33  | 3.41  | 8.99E-05 | 8.29E-03 | ENSG00000184792 |
| MCM4        | 2.38  | 6.91  | 9.29E-05 | 8.54E-03 | ENSG00000104738 |
| CYP24A1     | 5.74  | 1.26  | 9.31E-05 | 8.54E-03 | ENSG00000019186 |



|             |      |       |          |          |                 |
|-------------|------|-------|----------|----------|-----------------|
| MAGEB1      | 6.00 | 0.90  | 9.40E-05 | 8.59E-03 | ENSG00000214107 |
| CD22        | 4.30 | 3.37  | 9.55E-05 | 8.70E-03 | ENSG00000012124 |
| AC004980.2  | 5.49 | -1.16 | 9.59E-05 | 8.70E-03 | ENSG00000214243 |
| CHGB        | 4.52 | -0.17 | 1.01E-04 | 9.13E-03 | ENSG00000089199 |
| PAX9        | 5.59 | 1.98  | 1.04E-04 | 9.38E-03 | ENSG00000198807 |
| GAREM2      | 3.78 | 2.20  | 1.05E-04 | 9.42E-03 | ENSG00000157833 |
| PEG3        | 4.84 | 2.53  | 1.06E-04 | 9.54E-03 | ENSG00000198300 |
| RIMBP2      | 5.42 | 0.17  | 1.08E-04 | 9.63E-03 | ENSG00000060709 |
| FAM169A     | 3.67 | 1.86  | 1.17E-04 | 1.04E-02 | ENSG00000198780 |
| AC011447.4  | 4.09 | 0.65  | 1.18E-04 | 1.05E-02 | ENSG00000267771 |
| OR13C9      | 5.44 | -1.46 | 1.29E-04 | 1.14E-02 | ENSG00000136839 |
| PRSS12      | 4.11 | 5.91  | 1.30E-04 | 1.14E-02 | ENSG00000164099 |
| KCNK2       | 5.45 | 2.02  | 1.32E-04 | 1.16E-02 | ENSG00000082482 |
| SLC6A15     | 5.72 | 1.68  | 1.34E-04 | 1.17E-02 | ENSG00000072041 |
| PTPRQ       | 3.90 | 2.90  | 1.34E-04 | 1.17E-02 | ENSG00000139304 |
| ARPP21      | 4.39 | -0.32 | 1.36E-04 | 1.18E-02 | ENSG00000172995 |
| SLITRK1     | 5.15 | 0.81  | 1.36E-04 | 1.18E-02 | ENSG00000178235 |
| MED15P4     | 5.64 | 0.73  | 1.38E-04 | 1.20E-02 | ENSG00000224679 |
| ASTN2       | 2.89 | 3.79  | 1.43E-04 | 1.23E-02 | ENSG00000148219 |
| AC135068.11 | 5.77 | -0.57 | 1.44E-04 | 1.24E-02 | ENSG00000285491 |
| SDR9C7      | 3.93 | -0.10 | 1.50E-04 | 1.29E-02 | ENSG00000170426 |
| MIER3       | 2.31 | 5.83  | 1.51E-04 | 1.30E-02 | ENSG00000155545 |
| CXCL14      | 5.87 | 1.13  | 1.54E-04 | 1.31E-02 | ENSG00000145824 |
| RPL29P3     | 5.80 | -1.63 | 1.56E-04 | 1.33E-02 | ENSG00000243730 |
| SSX7        | 5.15 | -1.37 | 1.58E-04 | 1.33E-02 | ENSG00000187754 |
| SACS        | 2.16 | 9.29  | 1.58E-04 | 1.33E-02 | ENSG00000151835 |
| USH2A       | 3.80 | 0.11  | 1.60E-04 | 1.35E-02 | ENSG00000042781 |
| TUBAL3      | 5.78 | -1.63 | 1.61E-04 | 1.35E-02 | ENSG00000178462 |
| PRKDC       | 2.15 | 10.22 | 1.62E-04 | 1.36E-02 | ENSG00000253729 |
| ITPRID1     | 6.21 | 0.47  | 1.62E-04 | 1.36E-02 | ENSG00000180347 |
| MARCOL      | 5.78 | -1.63 | 1.64E-04 | 1.36E-02 | ENSG00000248109 |
| BX284668.3  | 5.78 | -1.63 | 1.64E-04 | 1.36E-02 | ENSG00000230239 |
| EDN3        | 5.88 | 3.51  | 1.65E-04 | 1.36E-02 | ENSG00000124205 |
| TMTC2       | 3.41 | 5.81  | 1.66E-04 | 1.37E-02 | ENSG00000179104 |
| POU3F3      | 4.44 | -1.08 | 1.67E-04 | 1.37E-02 | ENSG00000198914 |
| TPO         | 5.22 | -0.57 | 1.71E-04 | 1.40E-02 | ENSG00000115705 |
| PCOLCE-AS1  | 3.38 | 2.07  | 1.73E-04 | 1.41E-02 | ENSG00000224729 |
| ETNPPL      | 5.76 | -1.63 | 1.73E-04 | 1.41E-02 | ENSG00000164089 |
| COL9A3      | 4.03 | 3.88  | 1.75E-04 | 1.42E-02 | ENSG00000092758 |

|            |      |       |          |          |                 |
|------------|------|-------|----------|----------|-----------------|
| ADGRG2     | 4.80 | 2.53  | 1.90E-04 | 1.54E-02 | ENSG00000173698 |
| BRSK2      | 4.67 | 0.32  | 1.94E-04 | 1.57E-02 | ENSG00000174672 |
| VGLL2      | 5.64 | -1.35 | 1.95E-04 | 1.57E-02 | ENSG00000170162 |
| HOOK1      | 3.54 | 2.20  | 1.98E-04 | 1.59E-02 | ENSG00000134709 |
| PAK5       | 5.69 | -1.71 | 1.98E-04 | 1.59E-02 | ENSG00000101349 |
| PRSS42     | 3.72 | 1.00  | 2.01E-04 | 1.61E-02 | ENSG00000178055 |
| GRIA4      | 4.61 | 1.08  | 2.07E-04 | 1.65E-02 | ENSG00000152578 |
| LGSN       | 5.04 | 0.00  | 2.10E-04 | 1.67E-02 | ENSG00000146166 |
| NMU        | 3.88 | -0.48 | 2.16E-04 | 1.71E-02 | ENSG00000109255 |
| SLC7A3     | 6.18 | 0.59  | 2.17E-04 | 1.71E-02 | ENSG00000165349 |
| EVX1       | 5.64 | -1.70 | 2.25E-04 | 1.77E-02 | ENSG00000106038 |
| ANKRD30BP2 | 5.64 | -1.70 | 2.25E-04 | 1.77E-02 | ENSG00000224309 |
| EIF4HP2    | 3.56 | 0.39  | 2.26E-04 | 1.77E-02 | ENSG00000237977 |
| BMS1P7     | 4.96 | -1.21 | 2.28E-04 | 1.78E-02 | ENSG00000270025 |
| FKBP4P1    | 4.76 | -1.19 | 2.34E-04 | 1.82E-02 | ENSG00000251463 |
| AL513318.2 | 5.63 | -1.70 | 2.34E-04 | 1.82E-02 | ENSG00000269994 |
| MIR181B2   | 3.79 | -0.55 | 2.35E-04 | 1.82E-02 | ENSG00000207737 |
| IL17RB     | 3.68 | 0.08  | 2.36E-04 | 1.82E-02 | ENSG00000056736 |
| SPEF2      | 2.72 | 5.00  | 2.37E-04 | 1.82E-02 | ENSG00000152582 |
| ADGRD2     | 5.63 | -1.70 | 2.38E-04 | 1.82E-02 | ENSG00000180264 |
| SLC26A7    | 3.82 | 4.07  | 2.38E-04 | 1.82E-02 | ENSG00000147606 |
| SLC24A2    | 5.12 | 1.15  | 2.39E-04 | 1.82E-02 | ENSG00000155886 |
| OR8A1      | 5.20 | -1.03 | 2.39E-04 | 1.82E-02 | ENSG00000196119 |
| OR4N3P     | 4.78 | -1.20 | 2.41E-04 | 1.83E-02 | ENSG00000259435 |
| C16orf96   | 3.77 | 0.91  | 2.42E-04 | 1.83E-02 | ENSG00000205832 |
| GCGR       | 4.96 | -1.21 | 2.44E-04 | 1.84E-02 | ENSG00000215644 |
| GRK1       | 4.41 | -0.85 | 2.45E-04 | 1.85E-02 | ENSG00000185974 |
| AC073109.1 | 4.07 | 2.36  | 2.47E-04 | 1.86E-02 | ENSG00000235920 |
| RPL7L1P11  | 4.45 | -0.90 | 2.52E-04 | 1.89E-02 | ENSG00000176970 |
| FGFR2      | 3.37 | 4.50  | 2.78E-04 | 2.08E-02 | ENSG00000066468 |
| CNTNAP3    | 3.19 | 3.56  | 2.88E-04 | 2.15E-02 | ENSG00000106714 |
| SVIL2P     | 3.15 | 2.75  | 2.99E-04 | 2.22E-02 | ENSG00000234814 |
| CASQ2      | 4.66 | 1.57  | 3.00E-04 | 2.23E-02 | ENSG00000118729 |
| RPS26P15   | 4.34 | 1.21  | 3.02E-04 | 2.23E-02 | ENSG00000223416 |
| PIANP      | 4.62 | -0.16 | 3.03E-04 | 2.23E-02 | ENSG00000139200 |
| TSPAN7     | 3.81 | 0.85  | 3.03E-04 | 2.23E-02 | ENSG00000156298 |
| PDE1C      | 2.98 | 5.77  | 3.05E-04 | 2.24E-02 | ENSG00000154678 |
| AC027682.3 | 3.35 | 1.36  | 3.07E-04 | 2.25E-02 | ENSG00000260894 |
| GRM1       | 4.07 | 2.38  | 3.09E-04 | 2.26E-02 | ENSG00000152822 |

|             |      |       |          |          |                 |
|-------------|------|-------|----------|----------|-----------------|
| NSUN7       | 3.13 | 1.96  | 3.10E-04 | 2.26E-02 | ENSG00000179299 |
| F7          | 4.70 | 0.16  | 3.12E-04 | 2.27E-02 | ENSG00000057593 |
| NOTUM       | 4.75 | 0.34  | 3.14E-04 | 2.28E-02 | ENSG00000185269 |
| CNTFR       | 3.57 | 2.87  | 3.15E-04 | 2.28E-02 | ENSG00000122756 |
| WNK4        | 4.52 | 3.63  | 3.25E-04 | 2.35E-02 | ENSG00000126562 |
| HS3ST5      | 4.63 | -0.52 | 3.29E-04 | 2.37E-02 | ENSG00000249853 |
| STK26       | 2.82 | 3.57  | 3.33E-04 | 2.39E-02 | ENSG00000134602 |
| CNKS2R      | 4.53 | 2.60  | 3.35E-04 | 2.40E-02 | ENSG00000149970 |
| FAM183A     | 3.89 | 0.69  | 3.40E-04 | 2.43E-02 | ENSG00000186973 |
| GNGT1       | 4.72 | -1.07 | 3.45E-04 | 2.46E-02 | ENSG00000127928 |
| RIC3        | 3.90 | 1.66  | 3.66E-04 | 2.60E-02 | ENSG00000166405 |
| KCNT1       | 4.47 | -0.80 | 3.67E-04 | 2.60E-02 | ENSG00000107147 |
| NRK         | 4.43 | 4.33  | 3.69E-04 | 2.60E-02 | ENSG00000123572 |
| IL11RA      | 2.56 | 5.33  | 3.70E-04 | 2.61E-02 | ENSG00000137070 |
| AL021920.2  | 4.96 | 0.94  | 3.74E-04 | 2.63E-02 | ENSG00000280114 |
| OR8G2P      | 5.11 | -0.82 | 3.79E-04 | 2.66E-02 | ENSG00000181214 |
| SP8         | 5.16 | -1.58 | 3.81E-04 | 2.66E-02 | ENSG00000164651 |
| WNT16       | 5.16 | -1.58 | 3.81E-04 | 2.66E-02 | ENSG00000002745 |
| HOXA13      | 3.91 | 2.18  | 3.86E-04 | 2.68E-02 | ENSG00000106031 |
| PLPPR5      | 4.57 | -1.10 | 3.95E-04 | 2.74E-02 | ENSG00000117598 |
| FIGNL1      | 2.57 | 5.00  | 3.96E-04 | 2.74E-02 | ENSG00000132436 |
| IGDCC3      | 3.85 | 0.91  | 3.97E-04 | 2.74E-02 | ENSG00000174498 |
| DDX3P3      | 4.84 | -1.08 | 4.00E-04 | 2.75E-02 | ENSG00000251571 |
| MUM1L1      | 5.40 | 1.31  | 4.31E-04 | 2.96E-02 | ENSG00000157502 |
| GABRB3      | 3.96 | 0.21  | 4.35E-04 | 2.98E-02 | ENSG00000166206 |
| AC025569.1  | 4.23 | 2.87  | 4.35E-04 | 2.98E-02 | ENSG00000258168 |
| LRRC66      | 2.93 | 3.17  | 4.39E-04 | 3.00E-02 | ENSG00000188993 |
| IGKV1OR22-1 | 4.82 | -0.97 | 4.40E-04 | 3.00E-02 | ENSG00000253481 |
| ONECUT2     | 5.28 | -0.14 | 4.43E-04 | 3.00E-02 | ENSG00000119547 |
| WNK2        | 3.61 | 3.13  | 4.44E-04 | 3.00E-02 | ENSG00000165238 |
| XDH         | 4.72 | 3.22  | 4.44E-04 | 3.00E-02 | ENSG00000158125 |
| RADX        | 3.55 | 3.20  | 4.50E-04 | 3.03E-02 | ENSG00000147231 |
| TDRD5       | 3.90 | -0.12 | 4.52E-04 | 3.04E-02 | ENSG00000162782 |
| GABRG2      | 6.11 | 2.17  | 4.67E-04 | 3.12E-02 | ENSG00000113327 |
| TPTE2P1     | 4.16 | 1.00  | 4.67E-04 | 3.12E-02 | ENSG00000253771 |
| CATSPER4    | 4.78 | -1.32 | 4.74E-04 | 3.16E-02 | ENSG00000188782 |
| PCDH11X     | 5.12 | 3.57  | 4.76E-04 | 3.16E-02 | ENSG00000102290 |
| ZNF711      | 3.53 | 6.18  | 4.76E-04 | 3.16E-02 | ENSG00000147180 |
| NBEAP1      | 4.33 | 1.29  | 4.80E-04 | 3.18E-02 | ENSG00000258590 |

|            |       |       |          |          |                 |
|------------|-------|-------|----------|----------|-----------------|
| REG1A      | 5.52  | -1.78 | 4.84E-04 | 3.20E-02 | ENSG00000115386 |
| TPTE2P2    | 5.52  | -1.78 | 4.84E-04 | 3.20E-02 | ENSG00000272281 |
| ANKRD20A3  | 5.07  | -1.35 | 4.87E-04 | 3.21E-02 | ENSG00000276203 |
| OR2M3      | 5.06  | -1.65 | 4.99E-04 | 3.28E-02 | ENSG00000228198 |
| IL20RA     | 5.18  | 0.46  | 5.07E-04 | 3.32E-02 | ENSG00000016402 |
| CENPIP1    | 5.69  | -0.25 | 5.15E-04 | 3.36E-02 | ENSG00000224778 |
| AL512324.3 | 5.11  | -1.18 | 5.16E-04 | 3.36E-02 | ENSG00000278531 |
| PTH1R      | 2.70  | 4.86  | 5.16E-04 | 3.36E-02 | ENSG00000160801 |
| LINC01694  | 5.02  | -1.65 | 5.24E-04 | 3.40E-02 | ENSG00000233922 |
| CACNA2D2   | 3.60  | 2.42  | 5.27E-04 | 3.41E-02 | ENSG00000007402 |
| GOLGA8S    | 4.49  | -1.28 | 5.27E-04 | 3.41E-02 | ENSG00000261739 |
| ZCCHC12    | 3.67  | -0.09 | 5.31E-04 | 3.42E-02 | ENSG00000174460 |
| MYEOV      | 4.00  | -0.19 | 5.34E-04 | 3.43E-02 | ENSG00000172927 |
| MT2A       | -5.14 | 5.87  | 5.37E-04 | 3.44E-02 | ENSG00000125148 |
| PDZRN4     | 5.08  | 0.43  | 5.46E-04 | 3.50E-02 | ENSG00000165966 |
| VWC2       | 5.46  | -1.76 | 5.50E-04 | 3.51E-02 | ENSG00000188730 |
| RBM24      | 4.13  | 0.96  | 5.53E-04 | 3.53E-02 | ENSG00000112183 |
| SNRPCP5    | 5.46  | -1.76 | 5.57E-04 | 3.54E-02 | ENSG00000255522 |
| ASIC2      | 5.46  | -1.76 | 5.58E-04 | 3.54E-02 | ENSG00000108684 |
| SGCZ       | 5.33  | -1.53 | 5.59E-04 | 3.54E-02 | ENSG00000185053 |
| NBPF13P    | 3.97  | 0.41  | 5.62E-04 | 3.55E-02 | ENSG00000227242 |
| FLJ16779   | 5.00  | -1.64 | 5.67E-04 | 3.57E-02 | ENSG00000275620 |
| DLX6-AS1   | 4.91  | -1.04 | 5.79E-04 | 3.64E-02 | ENSG00000231764 |
| LRRC9      | 5.44  | -1.76 | 5.87E-04 | 3.68E-02 | ENSG00000131951 |
| GABRB2     | 4.43  | 0.01  | 5.89E-04 | 3.68E-02 | ENSG00000145864 |
| TAB3-AS2   | 4.37  | -1.26 | 5.95E-04 | 3.72E-02 | ENSG00000235512 |
| TMEM272    | 4.32  | -1.25 | 5.98E-04 | 3.73E-02 | ENSG00000281106 |
| CNTNAP3C   | 4.77  | -1.54 | 6.01E-04 | 3.73E-02 | ENSG00000283378 |
| UNC79      | 3.68  | 1.21  | 6.07E-04 | 3.76E-02 | ENSG00000133958 |
| SEMA3E     | 5.13  | 3.25  | 6.17E-04 | 3.82E-02 | ENSG00000170381 |
| GRPR       | 3.47  | 0.72  | 6.20E-04 | 3.83E-02 | ENSG00000126010 |
| AC073316.1 | 5.05  | 1.96  | 6.38E-04 | 3.93E-02 | ENSG00000217455 |
| ANKRD20A8P | 4.72  | 6.24  | 6.42E-04 | 3.94E-02 | ENSG00000229089 |
| THBS4      | 3.60  | 6.21  | 6.42E-04 | 3.94E-02 | ENSG00000113296 |
| OR10D3     | 5.40  | -0.68 | 6.56E-04 | 4.02E-02 | ENSG00000197309 |
| PIWIL2     | 3.35  | 3.46  | 6.62E-04 | 4.04E-02 | ENSG00000197181 |
| MVP        | -3.86 | 6.84  | 6.73E-04 | 4.10E-02 | ENSG00000013364 |
| ADGRV1     | 4.05  | 5.60  | 6.84E-04 | 4.16E-02 | ENSG00000164199 |
| ZSCAN23    | 3.35  | 2.56  | 6.91E-04 | 4.20E-02 | ENSG00000187987 |

|            |       |       |          |          |                 |
|------------|-------|-------|----------|----------|-----------------|
| IFITM2     | -4.15 | 6.30  | 7.04E-04 | 4.26E-02 | ENSG00000185201 |
| PLAG1      | 3.51  | 4.61  | 7.11E-04 | 4.30E-02 | ENSG00000181690 |
| SLC25A21   | 5.53  | -0.57 | 7.13E-04 | 4.30E-02 | ENSG00000183032 |
| CNBD1      | 3.98  | -0.51 | 7.24E-04 | 4.36E-02 | ENSG00000176571 |
| SMPD4P1    | 4.41  | -1.20 | 7.26E-04 | 4.36E-02 | ENSG00000223553 |
| AC007608.3 | 4.23  | -1.31 | 7.35E-04 | 4.40E-02 | ENSG00000260249 |
| SIM1       | 4.86  | 2.68  | 7.36E-04 | 4.40E-02 | ENSG00000112246 |
| CCKAR      | 4.31  | -0.54 | 7.41E-04 | 4.42E-02 | ENSG00000163394 |
| MAP3K8     | -3.56 | 5.44  | 7.46E-04 | 4.44E-02 | ENSG00000107968 |
| PNMA3      | 3.81  | 2.77  | 7.52E-04 | 4.47E-02 | ENSG00000183837 |
| SYT2       | 4.51  | -0.67 | 7.63E-04 | 4.53E-02 | ENSG00000143858 |
| ADH5P3     | 5.33  | -1.85 | 7.74E-04 | 4.58E-02 | ENSG00000223694 |
| ARG1       | 4.47  | -0.57 | 7.82E-04 | 4.62E-02 | ENSG00000118520 |
| SLC1A2     | 3.35  | 2.08  | 8.01E-04 | 4.72E-02 | ENSG00000110436 |
| MYO15A     | 3.27  | 4.68  | 8.07E-04 | 4.75E-02 | ENSG00000091536 |
| CYTL1      | 3.50  | 1.83  | 8.13E-04 | 4.77E-02 | ENSG00000170891 |
| BHLHE40    | -3.40 | 7.29  | 8.27E-04 | 4.84E-02 | ENSG00000134107 |
| ATAD5      | 1.99  | 6.06  | 8.42E-04 | 4.92E-02 | ENSG00000176208 |
| PNMT       | 4.59  | -1.60 | 8.45E-04 | 4.93E-02 | ENSG00000141744 |
| FAM124A    | 3.03  | 1.56  | 8.55E-04 | 4.97E-02 | ENSG00000150510 |
