# Supplementary material for: Genomic Characterization of Rare Primary Cardiac Sarcoma Entities
Source: MDPI journal article supplement (doi:10.3390/diagnostics13020214), 2023-01-06
Supplement: s1 [file s1]

**Supplementary Table S1.** Differentially expressed genes ( $q$ -value<0.05) between the leiomyosarcoma sample (CS11) and the group comprising cardiac angiosarcomas (CS6 and CS7) and intimal sarcomas (CS1, CS2, CS3, CS4 and CS5) (logFC = log2 fold change; logCPM = log2 counts per million; FDR = false discovery rate).

| GENE SYMBOL | logFC | logCPM | p-value  | FDR      | GENE ID         |
|-------------|-------|--------|----------|----------|-----------------|
| NKAIN2      | 9.63  | 3.94   | 1.54E-21 | 4.31E-17 | ENSG00000188580 |
| STPG2       | 6.81  | 3.96   | 3.37E-19 | 4.71E-15 | ENSG00000163116 |
| TSBP1       | 9.52  | 1.16   | 5.18E-13 | 4.83E-09 | ENSG00000204296 |
| CCDC162P    | 5.64  | 4.23   | 4.32E-11 | 3.02E-07 | ENSG00000203799 |
| GJB7        | 7.73  | 1.38   | 1.06E-10 | 5.93E-07 | ENSG00000164411 |
| AC024940.1  | 6.86  | 6.00   | 1.40E-09 | 6.55E-06 | ENSG00000177359 |
| ERI1        | 3.39  | 5.54   | 1.95E-09 | 6.99E-06 | ENSG00000104626 |
| AC068587.4  | 5.99  | 2.00   | 2.00E-09 | 6.99E-06 | ENSG00000283674 |
| RPS3AP34    | 5.90  | 1.95   | 2.23E-08 | 6.93E-05 | ENSG00000242607 |
| HSPD1P9     | 6.98  | 0.39   | 3.25E-08 | 9.10E-05 | ENSG00000228036 |
| AL080317.3  | 4.21  | 3.12   | 6.61E-08 | 1.68E-04 | ENSG00000272356 |
| AC009318.1  | 5.46  | 0.98   | 9.78E-08 | 2.16E-04 | ENSG00000257176 |
| PPHLN1      | 3.04  | 6.50   | 1.00E-07 | 2.16E-04 | ENSG00000134283 |
| MFHAS1      | 3.22  | 5.19   | 1.48E-07 | 2.97E-04 | ENSG00000147324 |
| LPA         | 6.98  | -0.49  | 1.92E-07 | 3.58E-04 | ENSG00000198670 |
| MFSD4B      | 3.03  | 5.79   | 3.04E-07 | 5.31E-04 | ENSG00000173214 |
| YAF2        | 3.09  | 6.12   | 3.93E-07 | 6.47E-04 | ENSG00000015153 |
| PTPRK       | 2.73  | 8.17   | 4.36E-07 | 6.78E-04 | ENSG00000152894 |
| RGS6        | 5.84  | 1.43   | 4.81E-07 | 7.09E-04 | ENSG00000182732 |
| AC087763.1  | 6.19  | -0.51  | 5.78E-07 | 8.09E-04 | ENSG00000270966 |
| IGHV2-70    | 5.79  | 1.36   | 7.43E-07 | 9.91E-04 | ENSG00000274576 |
| DSPP        | 4.09  | 2.81   | 9.13E-07 | 1.16E-03 | ENSG00000152591 |
| BMP5        | 7.21  | 4.37   | 1.00E-06 | 1.22E-03 | ENSG00000112175 |
| AC109635.4  | 6.48  | -0.49  | 1.71E-06 | 1.99E-03 | ENSG00000255042 |
| BRCA2       | 2.60  | 7.42   | 2.08E-06 | 2.33E-03 | ENSG00000139618 |
| OR7C1       | 5.71  | 0.65   | 2.19E-06 | 2.36E-03 | ENSG00000127530 |
| CPNE8       | 3.67  | 5.84   | 2.30E-06 | 2.39E-03 | ENSG00000139117 |
| AC134684.6  | 6.72  | -0.70  | 2.63E-06 | 2.63E-03 | ENSG00000284617 |
| SOX5        | 3.34  | 5.09   | 3.77E-06 | 3.64E-03 | ENSG00000134532 |
| AC022784.1  | 6.12  | 0.35   | 5.20E-06 | 4.85E-03 | ENSG00000248538 |
| PAK5        | 6.67  | -1.21  | 5.64E-06 | 5.10E-03 | ENSG00000101349 |
| RPL7P33     | 5.99  | -0.39  | 5.99E-06 | 5.24E-03 | ENSG00000215236 |
| PPP1R3B     | 2.70  | 5.35   | 7.08E-06 | 6.00E-03 | ENSG00000173281 |

|              |      |       |          |          |                 |
|--------------|------|-------|----------|----------|-----------------|
| OR7A5        | 6.60 | 1.19  | 8.88E-06 | 7.31E-03 | ENSG00000188269 |
| EXTL2P1      | 6.53 | -1.26 | 1.08E-05 | 8.62E-03 | ENSG00000223976 |
| ENAM         | 5.52 | 1.25  | 1.21E-05 | 9.40E-03 | ENSG00000132464 |
| AL445487.1   | 6.49 | -1.32 | 1.24E-05 | 9.42E-03 | ENSG00000226535 |
| SLC2A13      | 2.76 | 5.78  | 1.40E-05 | 1.03E-02 | ENSG00000151229 |
| AC009318.2   | 3.90 | 2.56  | 1.52E-05 | 1.09E-02 | ENSG00000273680 |
| AC009318.3   | 6.02 | -1.24 | 1.86E-05 | 1.30E-02 | ENSG00000274315 |
| DUX4L27      | 5.63 | -0.88 | 2.04E-05 | 1.39E-02 | ENSG00000258794 |
| ZCRB1        | 2.63 | 6.99  | 2.23E-05 | 1.49E-02 | ENSG00000139168 |
| TRAF3IP2-AS1 | 3.22 | 4.12  | 2.29E-05 | 1.49E-02 | ENSG00000231889 |
| ETFRF1       | 3.53 | 2.65  | 2.39E-05 | 1.52E-02 | ENSG00000205707 |
| CASC1        | 3.49 | 2.75  | 2.63E-05 | 1.64E-02 | ENSG00000118307 |
| KCNQ1OT1     | 3.20 | 5.18  | 2.76E-05 | 1.68E-02 | ENSG00000269821 |
| AC079601.1   | 3.92 | 1.10  | 3.17E-05 | 1.89E-02 | ENSG00000257225 |
| TUBE1        | 2.57 | 5.54  | 4.48E-05 | 2.61E-02 | ENSG00000074935 |
| MDM1         | 2.86 | 6.41  | 5.52E-05 | 3.16E-02 | ENSG00000111554 |
| GRIN2B       | 5.38 | 0.67  | 5.69E-05 | 3.19E-02 | ENSG00000273079 |
| SLC12A7      | 2.38 | 6.87  | 6.43E-05 | 3.53E-02 | ENSG00000113504 |
| AC022306.1   | 4.03 | 0.19  | 8.25E-05 | 4.44E-02 | ENSG00000259531 |
| IGLV3-1      | 4.29 | 4.23  | 8.59E-05 | 4.46E-02 | ENSG00000211673 |
| AC092451.2   | 6.00 | -1.55 | 8.75E-05 | 4.46E-02 | ENSG00000256079 |
| KNOP1P1      | 6.00 | -1.55 | 8.75E-05 | 4.46E-02 | ENSG00000256852 |
